# Supplementary material for: A Framework for Assessing the Impact of Outbreak Response Immunization Programs
Source: Diseases. 2024 Apr 4;12(4):73. doi: 10.3390/diseases12040073 (PMC11048879; doi:10.3390/diseases12040073)
Supplement: Supplementary file 1 [file diseases-12-00073-s001.zip › Review sources.xlsx]

## Sheet: Epi data
ID	URL	Publisher	Title	Infection	Region	Country	Data level	Measures	Notes	Source from search	Search engine used
1	https://africacdc.org/wp-content/uploads/2022/11/AfricaCDC_Uganda-Ebola-Outbreak-brief-8_-16Nov22-2.pdf	Africa CDC	Outbreak Brief #8: Sudan Ebola Virus Disease in Uganda	Ebola	Africa	Uganda	District	Cases per week, Deaths per week (probable vs confirmed), Percent contacts completed 21 days monitoring, Percent samples positive, Cumulative cases per district, Case fatality rate	More detail in PDF compared to main website, weekly cases/deaths calculated from prior weekly reports	Primary ("disease outbreak report africa")	Google
2	https://www.nicd.ac.za/measles-outbreak-update-in-limpopo-and-mpumlanga-province-24-november-2022/	South Africa NICD	MEASLES OUTBREAK UPDATE IN LIMPOPO AND MPUMALANGA PROVINCE (24 NOVEMBER 2022)	Measles	Africa	South Africa	District	Cases per week, Cumulative cases per age group, Cumulative cases per district, Cumulative cases by vaccination status, Cumulative deaths	Cases with laboratory confirmation from Sep 1 - Nov 22 2022, vaccination statuses are largely unknown	Primary ("measles outbreak report africa")	Google
3	https://reliefweb.int/report/samoa/measles-pacific-island-countries-and-areas	United Nations Office for the Coordination of Humanitarian Affairs	Measles – Pacific Island Countries and Areas	Measles	Pacific Islands	Samoa	Country	Cumulative cases, Cumulative deaths, Vaccine coverage	Epidemiological data from Jan 1 - Dec 4 2019, Vaccine data from 2018 estimate	Primary ("measles outbreak report pacific")	Google
4	https://reliefweb.int/report/samoa/measles-pacific-island-countries-and-areas	United Nations Office for the Coordination of Humanitarian Affairs	Measles – Pacific Island Countries and Areas	Measles	Pacific Islands	Tonga	Country	Cumulative cases, Cumulative deaths, Vaccine coverage	Epidemiological data from Ovt 22 - Dec 2 2019, Vaccine data from 2018 estimate	Primary ("measles outbreak report pacific")	Google
5	https://reliefweb.int/report/samoa/measles-pacific-island-countries-and-areas	United Nations Office for the Coordination of Humanitarian Affairs	Measles – Pacific Island Countries and Areas	Measles	Pacific Islands	Fiji	Country	Cumulative cases, Cumulative deaths, Vaccine coverage	Epidemiological data from Jan 1 - Dec 3 2019, Vaccine data from 2018 estimate	Primary ("measles outbreak report pacific")	Google
6	https://reliefweb.int/disaster/ep-2020-000120-caf	United Nations Office for the Coordination of Humanitarian Affairs	Central African Republic: Measles Outbreak - Jan 2020	Measles	Africa	Central African Republic	Country	Cumulative cases, Cumulative deaths, CFR estimates	Measures are reported for a range of timeframes, but the report is difficult to follow	Primary ("measles outbreak report africa")	Google
7	https://www.who.int/emergencies/disease-outbreak-news/item/2022-DON411	WHO	Ebola Virus Disease –Democratic Republic of the Congo	Ebola	Africa	Democratic Republic of the Congo	Country	Cumulative cases, Cumulative deaths, Percent contacts completed 21 days monitoring	Only one case	Secondary	Google
8	https://www.who.int/emergencies/disease-outbreak-news/item/measles-afghanistan	WHO	Measles – Afghanistan	Measles	Asia	Afghanistan	Country	Cumulative confirmed cases, Cumulative suspected cases, Cumulative deaths (confirmed), CFR estimate (confirmed), Vaccine coverage	Epidemiological data from Jan 1 2021 - Jan 29 2022	Secondary	Google
9	https://www.who.int/emergencies/disease-outbreak-news/item/2021-DON328	WHO	Ebola virus disease - Guinea	Ebola	Africa	Guinea	Country	Cumulative confirmed cases, Cumulative probable cases, Cumulative deaths	Epidemiological data from Feb 14 - Jun 19 2021	Secondary	Google
10	https://www.who.int/emergencies/disease-outbreak-news/item/2022-DON425	WHO	Ebola disease caused by Sudan ebolavirus – Uganda	Ebola	Africa	Uganda	District	Cumulative confirmed cases, Cumulative probable cases, Cumulative confirmed deaths, Cumulative cases per district (confirmed/probable), Cumualtive confirmed deaths per district, Cumulative cases in HCW, Estimated CFR, Percent contacts completed 21 days monitoring	Same outbreak as Source 1. Epidemiological data from Sep 20 - Nov 21 2022	Secondary	Google
11	https://www.who.int/emergencies/disease-outbreak-news/item/2021-DON325	WHO	Ebola virus disease - Democratic Republic of the Congo	Ebola	Africa	Democratic Republic of the Congo	Country	Cumulative confirmed cases, Cumulative probable cases, Cumulative deaths, Number contacts completed 21 days monitoring	Epidemiological data from Feb 7 - May 3 2021	Secondary	Google
12	https://africacdc.org/disease-outbreak/outbreak-brief-8-ebola-virus-disease-evd-in-the-democratic-republic-of-congo/	Africa CDC	Outbreak Brief 8: Ebola virus disease (EVD) in the Democratic Republic of Congo	Ebola	Africa	Democratic Republic of the Congo	Country	Cumulative confirmed cases, Cumulative probable cases, Weekly confirmed cases, Weekly probable cases, Cumulative deaths (confirmed), Cumulative deaths (probable), Weekly deaths (confirmed), Weekly deaths (probable), Estimated CFR	Epidemiological data from Sep 30 - Dec 3 2021, weekly cases/deaths calculated from prior weekly reports	Primary ("ebola cluster brief africa")	Google
13	https://africacdc.org/disease-outbreak/outbreak-brief-17-ebola-virus-disease-evd-outbreak/	Africa CDC	Outbreak Brief 17: Ebola virus disease (EVD) Outbreak	Ebola	Africa	Guinea	Country	Cumulative cases, Cumulative deaths, Weekly cases, Weekly deaths, Estimated CFR, Cumulative cases in HCW	Epidemiological data from Jan 15 - Jun 15 2021, weekly cases/deaths calculated from prior weekly reports	Secondary	Google
14	https://www.who.int/emergencies/disease-outbreak-news/item/2022-DON424	WHO	Dengue - Bangladesh	Dengue	Asia	Bangladesh	Country	Cumulative cases, Cumulative deaths, CFR estimates	Epidemiological data from Jan 1 - Nov 20 2022	Secondary	Google
15	https://www.who.int/emergencies/disease-outbreak-news/item/2022-DON422	WHO	Middle East respiratory syndrome coronavirus (MERS-CoV) - Saudi Arabia	MERS	Asia	Saudia Arabia	Country	Cumulative cases, Cumulative deaths	Epidemiological data from Dec 29 2021 - Oct 31 2022	Secondary	Google
16	https://www.who.int/emergencies/disease-outbreak-news/item/2022-DON419	WHO	Cholera - Malawi	Cholera	Africa	Malawi	Country	Cumulative cases, Cumulative deaths, CFR estimates, Cumulative cases per district, Cumulative deaths per district	Epidemiological data from Mar 3 - Oct 31 2022	Secondary	Google
17	https://www.who.int/emergencies/disease-outbreak-news/item/2022-DON409	WHO	Marburg virus - Ghana	Marburg virus	Africa	Ghana	Country	Cumulative cases, Cumulative deaths, CFR estimates, Number contacts completed 21 days monitoring	Epidemiological data from Jun 28 - Sep 16 2022	Secondary	Google
18	https://www.who.int/emergencies/disease-outbreak-news/item/2022-DON406	WHO	Circulating vaccine-derived poliovirus type 2 (cVDPV2) - Algeria	Vaccine-derived poliovirus type 2	Africa	Algeria	Country	Cumulative cases, Vaccine coverage	Only one case	Secondary	Google
19	https://www.who.int/emergencies/disease-outbreak-news/item/2022-DON405	WHO	Yellow fever - East, West, and Central Africa	Yellow fever	Africa	Cameroon	Country	Cumulative confirmed cases, Cumulative probable cases, Cumulative deaths (confirmed), Cumulative deaths (probable), CFR estimate (confirmed)	Source contains data for 12 African countries with outbreaks	Secondary	Google
20	https://www.who.int/emergencies/disease-outbreak-news/item/wild-poliovirus-type-1-(WPV1)-malawi	WHO	Wild poliovirus type 1 (WPV1) - Malawi	Wild poliovirus type 1	Africa	Malawi	Country	Cumulative cases	Only one case	Secondary	Google
21	https://www.who.int/emergencies/disease-outbreak-news/item/plague---madagascar	WHO	Plague - Madagascar	Plague	Africa	Madagascar	Country	Cumulative confirmed cases, Cumulative probable cases, Cumulative deaths (confirmed), CFR estimate (confirmed), Number contacts treated prophylaxis	Epidemiological data from Aug 29 - Sep 15 2021	Secondary	Google
22	https://www.who.int/emergencies/disease-outbreak-news/item/2021-DON334	WHO	Meningitis - Democratic Republic of the Congo	Meningitis	Africa	Democratic Republic of the Congo	Country	Cumulative confirmed cases, Cumulative suspected cases, Cumulative deaths, CFR estimate	Epidemiological data from Jul - Sep 18 2021	Secondary	Google
23	https://www.who.int/emergencies/disease-outbreak-news/item/monkeypox-democratic-republic-of-the-congo	WHO	Monkeypox - Democratic Republic of the Congo	Monkeypox	Africa	Democratic Republic of the Congo	Country	Cumulative suspected cases, Cumulative deaths, CFR estimate	Epidemiological data from Jan 1 - Sep 13 2020	Secondary	Google
24	https://www.who.int/emergencies/disease-outbreak-news/item/human-infection-with-avian-influenza-a(h5n1)-%EF%BD%B0-india	WHO	Human infection with avian influenza A(H5N1) ｰ India	Avian influenza A (H5N1)	Asia	India	Country	Cumulative cases	Only one case	Secondary	Google
25	https://www.nicd.ac.za/increase-in-pertussis-cases-in-south-africa-21-sept-2022/	South Africa NICD	INCREASE IN PERTUSSIS CASES IN SOUTH AFRICA (21 SEPT 2022)	Pertussis	Africa	South Africa	Country	Cases per month, Cumulative cases	Epidemiological data from Jan 1 - Sep 15 2022	Primary ("pertussis cluster report africa")	Google
26	https://www.nicd.ac.za/diphtheria-alert-kwazulu-natal-province-south-africa/	South Africa NICD	DIPHTHERIA ALERT: KWAZULU-NATAL PROVINCE, SOUTH AFRICA	Diphtheria	Africa	South Africa	Province	Cumulative cases, Cumulative deaths, Estimated CFR	Epidemiological data from Mar 30 - May 2 2018	Primary ("diphtheria cluster report africa")	Google
27	https://www.westerncape.gov.za/assets/departments/health/FP/wcgh_circular_h91_of_2021_-_diphtheria_alert_non-toxigenic_diphtheria_cluster_identified_in_the_west_coast_and_cape_winelands_districts.pdf	Western Cape Government	DIPHTHERIA ALERT: NON-TOXIGENIC DIPHTHERIA CLUSTER IDENTIFIED IN THE WEST COAST AND CAPE WINELANDS DISTRICTS	Diphtheria	Africa	South Africa	Province	Cumulative confirmed cases, Cumulative probable cases, Cumulative deaths	Appears to be an internal government document. Epidemiological data from Jun 8 - Jun 28 2021	Primary ("diphtheria cluster report africa")	Google
28	https://africacdc.org/disease-outbreak/outbreak-brief-18-monkeypox-in-africa-union-member-states/	Africa CDC	Outbreak Brief 18: Monkeypox in Africa Union Member States	Monkeypox	Africa	Democratic Republic of the Congo	Country	Cumulative confirmed cases, Cumulative suspected cases, Cumulative deaths, Weekly confirmed cases, Weekly suspected cases, Weekly deaths, Estimated CFR	Source contains data for 8 African countries with outbreaks, weekly cases/deaths calculated from prior weekly reports	Secondary	Google
29	https://www.who.int/emergencies/disease-outbreak-news/item/ebola-virus-disease-democratic-republic-of-the-congo	WHO	Ebola virus disease - Democratic Republic of the Congo	Ebola	Africa	Democratic Republic of the Congo	Country	Cumulative confirmed cases, Cumulative probable cases, Cumulative deaths, Estimated CFR, Cumulative cases in HCW	Epidemiological data from 25 Jun - 1 Sep 2020	Secondary	Google
30	https://www.who.int/emergencies/disease-outbreak-news/item/2020-DON284	WHO	Ebola virus disease - African Region (AFRO), Democratic Republic of the Congo	Ebola	Africa	Democratic Republic of the Congo	Country	Cumulative confirmed cases, Cumulative probable cases, Weekly cases, Cumulative deaths, Estimated CFR, Cumulative cases in HCW	Epidemiological data from Aug 1 2018 - 25 Jun 2020	Secondary	Google
31	https://www.who.int/emergencies/disease-outbreak-news/item/2022-DON371	WHO	Measles - Somalia	Measles	Africa	Somalia	District	Cumulative suspected cases, Cumulative suspected cases per district	Epidemiological data from 2 Jan - 5 Mar 2022	Secondary	Google
32	https://www.who.int/emergencies/disease-outbreak-news/item/2020-DON264	WHO	Measles - Burundi	Measles	Africa	Burundi	District	Cumulative confirmed cases, Cumulative confirmed cases per district, Cumulative confirmed cases by age group, Vaccination coverage		Secondary	Google
33	https://www.who.int/emergencies/disease-outbreak-news/item/2020-DON267	WHO	Measles - Mexico	Measles	South America	Mexico	Province	Cumulative confirmed cases, Cumulative confirmed cases per province, Cumulative suspected cases per province	Epidemiological data from 12 Feb - 2 Apr 2020	Secondary	Google
34	https://www.who.int/emergencies/disease-outbreak-news/item/2020-DON246	WHO	Measles - Central African Republic	Measles	Africa	Central African Republic	District	Cumulative suspected cases, Cumulative deaths, Estimated CFR	Epidemiological data from 1 Jan 2019 - 16 Feb 2020	Secondary	Google
35	https://www.who.int/emergencies/disease-outbreak-news/item/2019-DON195	WHO	Measles - Lebanon	Measles	Asia	Lebanon	Country	Cumulative cases, Proportion of cases confirmed, Cumulative deaths	Epidemiological data from 1 Nov 2018 - 12 Oct 2019	Secondary	Google
36	https://www.who.int/emergencies/disease-outbreak-news/item/2019-DON150	WHO	Measles - Tunisia	Measles	Africa	Tunisia	Country	Cumulative confirmed cases, Cumulative suspected cases, Cumulative deaths, Estimated CFR	Epidemiological data from 1 Jan - 30 Apr 2019	Secondary	Google
37	https://www.who.int/emergencies/disease-outbreak-news/item/2019-DON140	WHO	Measles - Madagascar	Measles	Africa	Madagascar	Country	Cumulative cases, Cumulative deaths, Estimated CFR	Epidemiological data from 4 Oct 2018 - 7 Jan 2019	Secondary	Google
38	https://africacdc.org/disease-outbreak/ebola-virus-disease-outbreak-11-february-2020/	Africa CDC	Ebola Virus Disease Outbreak – 11 February 2020	Ebola	Africa	Democratic Republic of the Congo	Country	Cumulative confirmed cases, Cumulative probable cases, Weekly cases, Cumulative deaths, Estimated CFR	More detail in PDF compared to main website. Same outbreak as Source 30.	Secondary	Google
39	https://reliefweb.int/disaster/ep-2021-000214-afg	United Nations Office for the Coordination of Humanitarian Affairs	Afghanistan: Measles Outbreak - Dec 2021	Measles	Asia	Afghanistan	Country	Cumulative cases, Cumulative deaths	Measures are reported for a range of timeframes, but the report is difficult to follow	Primary ("measles outbreak afghanistan")	Google
40	https://www.emro.who.int/images/stories/afghanistan/AFG_INFECTIOUS_DISEASE_OUTBREAKS_WEEK_47.pdf?ua=1	WHO	AFGHANISTAN INFECTIOUS DISEASE OUTBREAKS SITUATION REPORT Epidemiological week #47	Measles	Asia	Afghanistan	Country	Cumulative cases, Cumulative deaths, Weekly suspected cases, Weekly deaths, Estimated CFR	Epidemiological data from 1 May - 26 Nov 2022. Also contains data for pertussis and dengue	Primary ("disease outbreak report afghanistan")	Google
41	https://www.paho.org/en/documents/epidemiological-update-measles-10-november-2021	WHO	Epidemiological Update: Measles - 4 October 2021	Measles	South America	Brazil	Province	Cumulative suspected cases, Cumulative confirmed cases, Weekly suspected cases, Weekly confirmed cases, Cumulative deaths, Cumulative suspected cases per province, Cumulative confirmed cases per province	Epidemiological data from EW 1 - EW 43 2021. More data in PDF	Secondary	Google
42	https://www.paho.org/en/documents/epidemiological-update-measles-and-diphtheria-1-february-2021	WHO	Epidemiological Update: Measles and Diphtheria - 1 February 2021	Measles	South America	Brazil	Province	Cumulative suspected cases, Cumulative confirmed cases, Weekly suspected cases, Weekly confirmed cases, Cumulative deaths, Cumulative suspected cases per province, Cumulative confirmed cases per province	Epidemiological data from all of 2020. More data in PDF. Source also contains data for 6 other (relevant LMIC) countries, and outbreak data for diphtheria in the region	Secondary	Google
43	https://reliefweb.int/report/philippines/philippines-health-situation-snapshot-25-october-2019	United Nations Office for the Coordination of Humanitarian Affairs	Philippines: Health Situation Snapshot (as of 25 October 2019)	Measles	Asia	Philippines	Country	Cumulative cases, Cumulative deaths	Epidemiological data from 1 Jan - 12 Oct 2019. Also contains data for dengue, diphtheria, and polio	Primary ("disease outbreak report philippines")	Google
44	https://www3.paho.org/hq/index.php?option=com_docman&view=download&category_slug=measles-2204&alias=51808-28-february-2020-measles-epidemiological-update-1&Itemid=270&lang=en	PAHO	Epidemiological Update Measles 28 February 2020	Measles	Americas	Argentina, Brazil	Country	Cum. cases, Cum. deaths, Cum. cases/district, Cum. cases by vacc. status, Cum. cases/age group, epi. week of onset	Epidemiological data	secondary	Google
45	https://www.paho.org/en/documents/epidemiological-update-measles-24-january-2020	PAHO	Epidemiological Update Measles 24 January 2020	Measles	Americas	Argentina, Brazil, Colombia, USA, Venezuela	Country, Indigenous Communities	Cum. cases, Cum. deaths, Cum. cases by vacc. status, Cum. cases/age group, Cum. cases/district, epi. week of onset, Incidence rate, Cum. susp. cases	Epidemiological data	secondary	Google
46	https://www.paho.org/en/documents/epidemiological-update-measles-13-december-2019	PAHO	Epidemiological Update Measles 13 December 2019	Measles	Americas	Argentina, Brazil, Canada	Country, Indigenous Communities	Cum. cases, Cum. deaths, Cum. cases by vacc. status, Cum. cases/age group, Cum. cases/district, epi. week of onset, Incidence rate, Cum. susp. cases	Epidemiological data	secondary	Google
47	https://www.paho.org/en/documents/epidemiological-update-measles-01-november-2019	PAHO	Epidemiological Update Measles 1 November 2019	Measles	Americas	Argentina, Brazil, Canada, Columbia	Country, Indigenous Communities	Cum. cases, Cum. deaths, Cases/week, Cum. susp. cases, Incidence rate, Prop. cases conf., Cum. cases/district, Cum. cases/age group	Epidemiological data	secondary	Google
48	https://www3.paho.org/hq/index.php?option=com_docman&view=download&category_slug=measles-2204&alias=50420-25-september-2019-measles-epidemiological-update&Itemid=270&lang=en	PAHO	Epidemiological Update Measles 25 September 2019	Measles	Americas	Brazil, Canada, Chile, Colombia, Mexico, US, Venezuela,	Country, Indigenous Communities	Cum. cases, Cum. deaths, Cum. susp. cases, Incidence rate, Cum. cases/district, Cum. cases/age group, Prop. hospitalised, Prop. cases conf., Cases/week, epi. week of onset	Epidemiological data	secondary	Google
49	https://www3.paho.org/hq/index.php?option=com_docman&view=download&category_slug=measles-2204&alias=49586-7-august-2019-measles-epidemiological-update-1&Itemid=270&lang=en	PAHO	Epidemiological Update Measles 7 August 2019	Measles	Americas	Brazil, Canada, Colombia, US, Venezuala	Country, Indigenous Communities	Cum. cases, Cum. deaths, Cum. susp. cases, Prop. cases conf., Incidence rate, Cum. cases/district, Cum. cases/age group	Epidemiological data	secondary	Google
50	https://www3.paho.org/hq/index.php?option=com_docman&view=download&category_slug=measles-2204&alias=49076-18-june-2019-measles-epidemiological-update-1&Itemid=270&lang=en	PAHO	Epidemiological Update Measles 18 June 2019	Measles	Americas	Brazil, Canada, Colombia, US	Country, Indigenous Communities	Cum. cases, Cum. susp. cases, Prop. cases conf., Incidence rate, epi. week of onset, Cum. cases/district, Cum. cases/age group	Epidemiological data	secondary	Google
51	https://www3.paho.org/hq/index.php?option=com_docman&view=download&category_slug=measles-2204&alias=48608-17-may-2019-epidemiological-update-on-measles-1&Itemid=270&lang=en	PAHO	Epidemiological Update Measles 17 May 2019	Measles	Americas	Brazil, Canada, Chile, Colombia, US, Venezuala	Country, Indigenous Communities	Cum. cases, epi. week of onset, Cum. susp. cases, Prop. cases conf., Incidence rate, Cum. cases/district, Cum. cases/age group	Epidemiological data	secondary	Google
52	https://www3.paho.org/hq/index.php?option=com_docman&view=download&category_slug=measles-2204&alias=48288-18-april-2019-measles-epidemiological-update-1&Itemid=270&lang=en	PAHO	Epidemiological Update Measles 18 April 2019	Measles	Americas	Brazil, Canada, Chile, Colombia, US, Venezuala	Country, Indigenous Communities	Cum. cases, Prop. cases conf., Cum. deaths, Cum. cases/district, Cum. susp. cases, Incidence rate, Cum. cases/age group, epi. week of onset	Epidemiological data	secondary	Google
53	https://www3.paho.org/hq/index.php?option=com_docman&view=download&category_slug=measles-2204&alias=47907-4-march-2019-measles-epidemiological-update&Itemid=270&lang=en	PAHO	Epidemiological Update Measles 4 March 2019	Measles	Americas	Brazil, Chile, Colombia, Venezuala,	Country, Indigenous Communities	Cum. cases, Cum. deaths, Cum. cases/district, Cases/week, Prop. cases conf., Cum. cases/age group, epi. week of onset, Incidence rate	Epidemiological data	secondary	Google
54	https://www3.paho.org/hq/index.php?option=com_docman&view=download&category_slug=measles-2204&alias=47518-18-january-2019-measles-epidemiological-update&Itemid=270&lang=en	PAHO	Epidemiological Update Measles 18 January 2019	Measles	Americas	Brazil, Chile, Colombia, Venezuala,	Country, Indigenous Communities	Cum. cases, Cum. deaths, Cum. susp. cases, Prop. cases conf., Incidence rate, Cum. cases/district, Cum. cases/age group, epi. week of onset, Cases/week	Epidemiological data	secondary	Google
55	https://www3.paho.org/hq/index.php?option=com_docman&view=download&category_slug=measles-2204&alias=47163-30-november-2018-measles-epidemiological-update&Itemid=270&lang=en	PAHO	Epidemiological Update Measles 30 November 2018	Measles	Americas	Brazil, Colombia, Venezuala	Country, Indigenous Communities	Cum. cases, Cum. deaths, Cum. cases/age group, Cum. cases/district, Incidence rate	Epidemiological data	secondary	Google
56	https://www.paho.org/en/documents/colombia-meeting-measles-rubella-elimination-regional-monitoring-and-re-verification	PAHO	Meeting of the Measles Rubella Elimination REgional Monitoring and Re-verification Commission with the Colombian Health Authorities	Measles	Americas	Colombia	Country	Prop. cases conf., Cum. cases/age group	Epidemiological data	secondary	Google
57	https://www.paho.org/en/documents/epidemiological-alert-yellow-fever-31-august-2022	PAHO	Epidemiological Alert Yellow Fever 31 August 2022	Yellow fever	Americas	Brazil, Paraguay, Argentina, Peru	Country	Cumulative cases, Cumulative deaths, vaccination coverage,	Epidemiological data	Secondary	Google
58	https://www.paho.org/en/documents/epidemiological-alert-yellow-fever-28-december-2021	PAHO	Epidemiological Update Yellow Fever 28 December 2021	Yellow fever	Americas	Bolivia, Brazil, Peru, Venezuela	Country	Cumulative cases, Cumulative deaths, Cumulative suspected cases,	Epidemiological data	Secondary	Google
59	https://www.paho.org/en/documents/yellow-fever-region-americas-vaccine-reserve-stockpile-management-26-may-2022#:~:text=26%20May%202022-,Yellow%20fever%20in%20the%20Region%20of%20the%20Americas%3A%20Vaccine,stockpile%20management%20%2D%2026%20May%202022&text=In%202022%2C%20as%20of%20epidemiological,Peru%20(2%20confirmed%20cases).	PAHO	Yellow fever in the Region of the Americas: Vaccine reserve stockpile management 26 May 2022	Yellow fever	Americas	Argentina, Bolivia, Brazil, Colombia, Ecuador, Guyana, Panama, Paraguay, Peru, Suriname, Trinidad and Tobago, Venezuela	Country	Vaccination coverage, Cumulative cases, Cumulative suspected cases,	Epidemiological data	Secondary	Google
60	https://www.paho.org/en/documents/epidemiological-alert-yellow-fever-25-january-2019	PAHO	Epidemiological Update Yellow Fever 25 January 2019	`Yellow fever	Americas	Bolivia, Brazil, Colombia, Ecuador, French Guiana, Peru	Country	Cumulative confirmed cases, Cumulative Vaccination coverage	Epidemiological data	Secondary	Google
61	https://www.paho.org/en/documents/10-july-2017-yellow-fever-epidemiological-update-0	PAHO	Epidemiological Update Yellow Fever 10 July 2017	Yellow fever	Americas	Brazil, Colombia, Ecuador, Peru, Bolivia, Suriname	Country	Cumulative confirmed cases, Cumulative suspected cases, Cumulative deaths, Vaccine coverage	Epidemiological data	Secondary	Google
62	https://reliefweb.int/report/fiji/fiji-meningococcal-c-outbreak-situation-report-volume-14-2018-report-date-23rd-september	Ministry of Health and Medical Services	Fiji Meningococcal C Outbreak Situation Report Volume 14 2018	Meningitis	Pacific Islands	Fiji	Country	Cumulative confirmed cases, Cumulative suspected cases, Cumulative deaths (confirmed), CFR estimate (confirmed), Vaccine coverage	Epidemiological data	Primary (Fiji Centre for Communicable Disease Control)	Google
63	https://www.who.int/emergencies/disease-outbreak-news/item/2022-DON405	WHO	Yellow fever – African Region	Yellow fever	Africa	Cameroon, the Central African Republic, Chad, Cote d’Ivoire, the Democratic Republic of the Congo, Ghana, Nigeria, and the Republic of the Congo, Kenya, Niger, Sierra Leone, Uganda	Country	Probable cases, confirmed cases, deaths among probable cases, deaths among confirmed cases, CFR	Epidemiological data	Secondary	Google
64	https://www.who.int/emergencies/disease-outbreak-news/item/2022-DON431#:~:text=Since%202021%2C%20a%20total%20of,(six%20deaths%2C%2012%25).	WHO	Yellow Fever: East, West and Central Africa region	Yellow fever	Africa	Cameroon, Central African Republic, Chad, Cote d’Ivoire, Democratic Republic of Congo, Ghana, Kenya, Niger, Nigeria, Republic of the Congo, Sierra Leone, Uganda)	Country	Confirmed cases, probable cases, deaths, CFR)	Epidemiological data	Secondary	Google
65	https://africacdc.org/disease/cholera/	Africa CDC	Cholera	Cholera	Africa	Ethiopia, Cameroon, Tanzania, Angola, Algeria, Mozambique, DRC, Somalia, Kenya, Zambia, DRC, South Sudan, Sierra Leone, Republic of Congo, Chad, Niger, Nigeria, Zimbabwe, Guinea-Bissau	Country	Cases, Deaths	Epidemiological data	Secondary	Google
66	https://www.humanitarianresponse.info/sites/www.humanitarianresponse.info/files/2019/04/Cholera-Outbreaks-Bulletin-in-Eastern-and-Southern-Africa-Region%2C-as-of-18-March-2019%2C-5th-Issue.pdf	UNICEF	Cholera and AWD Outbreaks in Eastern and Southern Africa	Cholera	Africa	Eastern and Southern Africa	Country	Cumulative cases, cumulative deaths, CFR	Epidemiological data	Secondary	Google
67	https://www.nicd.ac.za/update-outbreak-of-cholera-in-south-africa-1-march-2023/	National Institute for Communicable Diseases	UPDATE | OUTBREAK OF CHOLERA IN SOUTH AFRICA (1 MARCH 2023)	Cholera	Africa	South Africa	Country	Cumulative cases, Cumulative deaths	Epidemiological data	Secondary	Google
68	https://apps.who.int/iris/bitstream/handle/10665/366504/OEW11-0612032023.pdf	WHO	Weekly Bulletin on Outbreaks and Other Emergencies	Cholera	Africa	African region	Country	Cumulative cases, Confirmed cases, Deaths, CFR	Epidemiological data	Secondary	Google
69	https://www.afro.who.int/health-topics/cholera/outbreak/2-march-2018-drc	WHO Africa	Disease outbreak - Cholera - DRC - 2 March 2018	Cholera	Africa	DRC	Country	Cumulative cases, Cumulative deaths, CFR, Cumulative confirmed cases, Cumulative suspected cases	Epidemiological data	Secondary	Google
70	https://www.who.int/emergencies/disease-outbreak-news/item/2023-DON439	WHO	Meningitis – Niger	Meningitis	Africa	Niger	Country	Cumulative cases, Confirmed cases, Deaths, CFR	Epidemiological data	Secondary data	Google
71	https://reliefweb.int/report/nepal/epidemiology-and-disease-control-division-cholera-outbreak-kathmandu-valley-2nd-august-2022	Ministry of Health and Population	CHOLERA OUTBREAK IN KATHMANDU VALLEY	Cholera	South East Asia region	Nepal	Province	Cumulative cases, Deaths, Cumulative cases per age group	Epidemiological data	Secondary data	Google

## Sheet: System_cost data
ID	URL	Publisher	Title	Infection	Region	Country	Data level	Measures	Notes	Source from search	Search engine used
1	https://currents.plos.org/outbreaks/article/rapid-assessment-of-ebola-related-implications-for-reproductive-maternal-newborn-and-child-health-service-delivery-and-utilization-in-guinea/	PLoS Current Outbreak	Rapid assessment of Ebola-related implications for reproductive, maternal, newborn and child health service delivery and utilization in Guinea	Ebola	Africa	Guinea	Country	Change in outpatient visits, change in admissions, change in major surgeries, change in children visits, change in immunisation delivery		Secondary source from https://www.frontiersin.org/articles/10.3389/fpubh.2016.00222/full	Google
2	https://currents.plos.org/outbreaks/article/ebola-and-indirect-effects-on-health-service-function-in-sierra-leone/	PLoS Current Outbreak	Ebola and indirect effects on health service function in Sierra Leone	Ebola	Africa	Sierra Leone	Country	Change in admissions, change in major surgeries		Secondary source from https://www.frontiersin.org/articles/10.3389/fpubh.2016.00222/full	Google
3	https://journals.plos.org/plosone/article?id=10.1371/journal.pone.0150080	PLoS One	The impact of the West Africa Ebola Outbreak on obstetric health care in Sierra Leone	Ebola	Africa	Sierra Leone	Country	Change in in-hospital deliveries, change in cesarean sections		Secondary source from https://www.frontiersin.org/articles/10.3389/fpubh.2016.00222/full	Google
4	https://militaryhealth.bmj.com/content/162/3/212	BMJ Military Health	Surgery in the time of Ebola: how events impacted on a single surgical institution in Sierra Leone	Ebola	Africa	Sierra Leone	Facility	Change in admissions, change in surgeries		Secondary source from https://www.frontiersin.org/articles/10.3389/fpubh.2016.00222/full	Google
5	https://solthis.org/wp-content/uploads/2015/10/1.-Poster-CROI-2015.pdf	Solthis	Impact of the Ebola outbreak on the Quality of Care of People Living with HIV Taking Antiretroviral Treatment at Donka National Hospital in Conakry, Guinea	Ebola	Africa	Guinea	Facility	Change in visits	A poster	Secondary source from https://www.frontiersin.org/articles/10.3389/fpubh.2016.00222/full	Google
6	https://www.cdc.gov/mmWr/preview/mmwrhtml/mm6351a3.htm	CDC	Perceptions of the Risk for Ebola and Health Facility Use Among Health Workers and Pregnant and Lactating Women — Kenema District, Sierra Leone, September 2014	Ebola	Africa	Sierra Leone	District	Change in visits	A report	Secondary source from https://www.frontiersin.org/articles/10.3389/fpubh.2016.00222/full	Google
7	https://academic.oup.com/jpubhealth/article/38/4/673/2966926	Journal of Public Health	Impact of the Ebola outbreak on health systems and population health in Sierra Leone	Ebola	Africa	Sierra Leone	Country	Change in visits, change in health facility deliveries		Secondary source from https://www.frontiersin.org/articles/10.3389/fpubh.2016.00222/full	Google
8	https://obgyn.onlinelibrary.wiley.com/doi/abs/10.1016/S0020-7292%2815%2930003-5	International Journal of Gynecology & Obstetrics	The impact of the Ebola virus epidemic on reproductive and maternal health care services in Guinea	Ebola	Africa	Guinea	Country	Change in delivery care, change in cesarean sections, change in family planning services	Abstract only	Secondary source from https://www.frontiersin.org/articles/10.3389/fpubh.2016.00222/full	Google
9	https://currents.plos.org/outbreaks/?p=56784	PLoS Current Outbreak	Services for mothers and newborns during the Ebola outbreak in Liberia: the need for improvement in emergencies	Ebola	Africa	Liberia	Country	Change in visits, change in deliveries		Secondary source from https://www.frontiersin.org/articles/10.3389/fpubh.2016.00222/full	Google
10	https://www.ncbi.nlm.nih.gov/pmc/articles/PMC4571280/	Proceedings of the Conference on Retroviruses and Opportunistic Infections	Impact of the Ebola epidemic on HIV care in Macenta, Forest Guinea, 2014	Ebola	Africa	Guinea	Facility	Change in outpatient visits, change in HIV tests, change in HIV care enrolment, change in HIV follow-up attendance		Secondary source from https://www.frontiersin.org/articles/10.3389/fpubh.2016.00222/full	Google
11	https://bmcpregnancychildbirth.biomedcentral.com/articles/10.1186/s12884-015-0694-x	BMC Pregnancy and Childbirth	A case series study on the effect of Ebola on facility-based deliveries in rural Liberia	Ebola	Africa	Liberia	Facility	Change in visits, change in follow-up delay, change in new patients/week		Secondary source from https://www.frontiersin.org/articles/10.3389/fpubh.2016.00222/full	Google
12	https://www.thelancet.com/journals/lancet/article/PIIS0140-6736(15)60713-9/fulltext	Lancet	Prevention of HIV spread during the Ebola outbreak in Guinea	Ebola	Africa	Guinea	Facility	Change in defaulters, change in active patients		Secondary source from https://www.frontiersin.org/articles/10.3389/fpubh.2016.00222/full	Google
13	https://www.thelancet.com/journals/laninf/article/PIIS1473-3099(15)00061-4/fulltext	The Lancet Infectious Diseases	Effect of the Ebola-virus-disease epidemic on malaria case management in Guinea, 2014: a cross-sectional survey of health facilities	Ebola	Africa	Guinea	Country	Change in outpatient visits, change in malaria case presentation		Secondary source from https://www.frontiersin.org/articles/10.3389/fpubh.2016.00222/full	Google
14	https://www.vsointernational.org/sites/default/files/VSO%20Sierroa%20Leone%20-%20Impact%20of%20Ebola.pdf	VSO International	Exploring the Impact of the Ebola Outbreak on Routine Maternal Health Services in Sierra Leone	Ebola	Africa	Sierra Leone	Country	Change in facility deliveries, change in visits		Secondary source from https://www.frontiersin.org/articles/10.3389/fpubh.2016.00222/full	Google
15	https://link.springer.com/article/10.1007/s10389-021-01590-2	Journal of Public Health	Measles outbreak investigation process in low- and middle-income countries: a systematic review of the methods and costs of contact tracing	Measles	World	N/A	Country	Contact tracing cost per case		Primary	Google
16	https://www.researchgate.net/publication/319499438_Cost_of_a_measles_outbreak_in_a_remote_island_economy_2014_Federated_States_of_Micronesia_measles_outbreak	Vaccine	Cost of a measles outbreak in a remote island economy: 2014 FederatedStates of Micronesia measles outbreak	Measles	Pacific	Micronesia	Country	Containment costs, direct costs, indirect costs		Primary	Google
17	https://www.sciencedirect.com/science/article/pii/S0277953615003500	Social Science & Medicine	Comparing the health and social protection effects of measles vaccination strategies in Ethiopia: An extended cost-effectiveness analysis	Measles	Africa	Ethiopia	Country	Vaccine delivery costs		Primary	Google
18	https://www.theigc.org/case-studies/economic-impacts-ebola	IGC	The economic impacts of Ebola	Ebola	Africa	Liberia	Country	Percentage of businesses closed, percentage decline in number of employees		Primary	Google
19	https://www.worldbank.org/en/topic/macroeconomics/publication/2014-2015-west-africa-ebola-crisis-impact-update	World Bank	2014-2015 West Africa Ebola Crisis: Impact Update	Ebola	Africa	Guinea, Liberia, Sierra Leone	Country	Overall economic impact, impact on GDP growth		Primary	Google
20	https://academic.oup.com/jid/article/218/Supplement_5/S698/5129071	The Journal of Infectious Diseases	The Economic and Social Burden of the 2014 Ebola Outbreak in West Africa	Ebola	Africa	West Africa	Region	Direct cost		Primary	Google
21	https://www.sciencedirect.com/science/article/pii/S2468227622004173	Scientific African	Impacts of Ebola disease outbreak in West Africa: Implications for government and public health preparedness and lessons from COVID-19	Ebola	Africa	West Africa	Region	Direct cost, economic output impact, economic growth impact, impact on maternal delivery, impact on malaria admissions		Primary	Google
22	https://designbykod.com/sites/ebola_crisis_site/img/the_report.pdf	World Bank	The Economic Impact of the 2014 Ebola Epidemic: Short and Medium Term Estimates for Guinea, Liberia, and Sierra Leone	Ebola	Africa	Guinea, Liberia, Sierra Leone	Country	Overall economic impact, impact on GDP growth		Primary	Google
23	https://idpjournal.biomedcentral.com/articles/10.1186/s40249-018-0484-6#:~:text=The%20cost%20of%20responding%20to,694%20452%20(Table%201).	Infectious Diseases of Poverty	Resources needed for US CDC’s support to the response to post-epidemic clusters of Ebola in West Africa, 2016	Ebola	Africa	Guinea, Liberia, Sierra Leone	Country	Breakdowns of response costs		Primary	Google
24	https://www.ncbi.nlm.nih.gov/pmc/articles/PMC4682177/	Open Forum Infectious Diseases	Economic Impact of Meningococcal Outbreaks in Brazil and Colombia	Meningitis	South America	Brazil, Colombia	District	Direct cost (for investigation and surveillance)		Secondary	Google
25	https://www.sciencedirect.com/science/article/pii/S1054139X16300155	Journal of Adolescent Health	Deciphering the Burden of Meningococcal Disease: Conventional and Under-recognized Elements	Meningitis	World	N/A	Developing countries	Direct costs, indirect costs		Secondary	Google
26	https://www.sciencedirect.com/science/article/pii/S0264410X1100778X?via%3Dihub	Vaccine	Costs and impact of meningitis epidemics for the public health system in Burkina Faso	Meningitis	Africa	Burkina Faso	Country	Total cost, direct costs, indirect costs, vaccine costs, case management costs		Primary	Google
27	https://www.ncbi.nlm.nih.gov/pmc/articles/PMC9341010/	Ethiopian Journal of Health Sciences	The Cost of Suspected and Confirmed Bacterial Meningitis Cases Treated at Jimma University Medical Center, Ethiopia	Meningitis	Africa	Ethipoia	Facility	Total cost, direct costs		Primary	Google
28	https://www.ncbi.nlm.nih.gov/pmc/articles/PMC4221459/	Journal of Health, Population and Nutrition	Estimating Costs Associated with a Community Outbreak of Meningococcal Disease in a Colombian Caribbean City	Meningitis	South America	Colombia	District	Total cost, direct costs		Primary	Google
29	https://www.cdc.gov/meningococcal/pubs-tools/multimedia/meningitis-a-infographic.html#:~:text=MenAfriVac%C2%AE%20costs%20only%20%240.40,to%20an%20outbreak%20or%20epidemic.	CDC	Serogroup A Meningococcal Meningitis in Sub-Saharan Africa Infographic	Meningitis	Africa	N/A	Region	Vaccine cost, treatment cost		Primary	Google
30	https://www.ncbi.nlm.nih.gov/pmc/articles/PMC3691489/#!po=31.8182	Pharmacoeconomics	The Cost and Public Health Burden of Invasive Meningococcal Disease Outbreaks: A Systematic Review	Meningitis	Africa	Guinea, Senegal, Burkina Faso	Country	Vaccine cost, direct costs	Systematic review with results from other analyses	Primary	Google
31	https://www.sciencedirect.com/science/article/pii/S0264410X15014607?via%3Dihub	Vaccine	The actual and potential costs of meningitis surveillance in the African meningitis belt: Results from Chad and Niger	Meningitis	Africa	Niger, Chad	Country	Direct cost		Secondary	Google
32	https://bmjopen.bmj.com/content/12/6/e052337	BMJ Open	Economic impact of cholera in households in rural southern Malawi: a prospective study	Cholera	Africa	Malawi	Country	Direct costs, indirect costs		Primary	Google
33	https://www.ncbi.nlm.nih.gov/pmc/articles/PMC2691726/#!po=55.0000	BMC International Health and Human Rights	Economic burden of cholera in the WHO African region	Cholera	Africa	N/A	Region	Direct costs, indirect costs		Primary	Google
34	https://www.sciencedirect.com/science/article/pii/S0264410X1931343X	Vaccine	Economic burden of cholera in Asia	Cholera	Asia	N/A	Region	Direct costs, indirect costs		Primary	Google
35	https://healtheconomicsreview.biomedcentral.com/articles/10.1186/s13561-017-0182-2	Health Economics Review	Economic evaluation of 2014 cholera outbreak in Ghana: a household cost analysis	Cholera	Africa	Ghana	Country	Direct costs, indirect costs		Secondary	Google
36	https://www.ncbi.nlm.nih.gov/pmc/articles/PMC6544210/	PLOS One	Evaluating the costs of cholera illness and cost-effectiveness of a single dose oral vaccination campaign in Lusaka, Zambia	Cholera	Africa	Zambia	District	Direct costs, indirect costs, vaccine costs		Secondary	Google
37	https://www.ncbi.nlm.nih.gov/pmc/articles/PMC6290934/	Human Vaccines & Immunotherapeutics	Feasibility and costs of a targeted cholera vaccination campaign in Ethiopia	Cholera	Africa	Ethiopia	Country	Vaccine costs		Primary	Google
38	https://resource-allocation.biomedcentral.com/articles/10.1186/s12962-021-00270-y	Cost Effectiveness and Resource Allocation	Cost-effectiveness of a reactive oral cholera immunization campaign using Shanchol™ in Malawi	Cholera	Africa	Malawi	Country	Direct costs, indirect costs, vaccine costs		Primary	Google
39	https://www.sciencedirect.com/science/article/pii/S2590136222001073	Vaccine: X	Cost of oral cholera vaccine delivery in a mass immunization program for children in urban Bangladesh	Cholera	Asia	Bangladesh	Country	Vaccine costs		Secondary	Google
40	https://www.sciencedirect.com/science/article/pii/S0264410X13013868?via%3Dihub	Vaccine	Coverage and cost of a large oral cholera vaccination program in a high-risk cholera endemic urban population in Dhaka, Bangladesh	Cholera	Asia	Bangladesh	Province	Vaccine costs		Secondary	Google
41	https://www.ncbi.nlm.nih.gov/pmc/articles/PMC6663147/	Human Vaccines & Immunotherapeutics	Feasibility, coverage and cost of oral cholera vaccination conducted by icddr,b using the existing national immunization service delivery mechanism in rural setting Keraniganj, Bangladesh	Cholera	Asia	Bangladesh	Province	Vaccine costs		Primary	Google
42	https://journals.plos.org/plosntds/article?id=10.1371/journal.pntd.0001844	PLOS Neglected Tropical Diseases	Costs of Illness Due to Cholera, Costs of Immunization and Cost-Effectiveness of an Oral Cholera Mass Vaccination Campaign in Zanzibar	Cholera	Africa	Zanzibar	Country	Direct costs, indirect costs, vaccine costs		Secondary	Google
43	https://bmjopen.bmj.com/content/12/9/e053585	BMJ Open	Pre-emptive oral cholera vaccine (OCV) mass vaccination campaign in Cuamba District, Niassa Province, Mozambique: feasibility, vaccination coverage and delivery costs using CholTool	Cholera	Africa	Mozambique	District	Vaccine costs		Primary	Google
44	https://journals.plos.org/plosntds/article?id=10.1371/journal.pntd.0002629	PLOS Neglected Tropical Diseases	Mass Vaccination with a New, Less Expensive Oral Cholera Vaccine Using Public Health Infrastructure in India: The Odisha Model	Cholera	Asia	India	Country	Vaccine costs		Primary	Google
45	https://www.sciencedirect.com/science/article/pii/S0264410X1400824X	Vaccine	Evaluation of economic costs of a measles outbreak and outbreak response activities in Keffa Zone, Ethiopia	Measles	Africa	Ethiopia	Province	Direct costs, indirect costs		Primary	Google Scholar
46	https://assets.researchsquare.com/files/rs-4169/v1/f4022689-abc0-433e-b459-249c16ddef57.pdf?c=1631826588	Research Square	Costs of Responding to a Measles Outbreak: Buvuma Islands, Lake Victoria, Uganda, February-May 2017	Measles	Africa	Uganda	District	Direct costs, indirect costs		Primary	Google Scholar
47	https://reproductive-health-journal.biomedcentral.com/articles/10.1186/s12978-022-01343-8	Reproductive Health	The effect of Ebola virus disease on maternal health service utilisation and perinatal outcomes in West Africa: a systematic review	Ebola	Africa	N/A	Region	Impact on ANC attendance, impact on institutional births, impact on PNC		Primary	Google Scholar
48	https://onlinelibrary.wiley.com/doi/full/10.1111/tmi.13704	Tropical Medicine & International Health	Current status and challenges in the care of patients with bacterial meningitis in the Philippines: A scoping review	Meningitis	South-East Asia	Philippines	Country	Vaccine costs, treatment costs		Primary	Google Scholar
49	https://www.tandfonline.com/doi/full/10.1080/21645515.2022.2103319	Human Vaccines & Immunotherapeutics	Economic burden of meningococcal disease in children and adolescents in Tijuana, Mexico	Meningitis	South America	Mexico	Province	Direct costs, indirect costs		Primary	Google Scholar
50	https://journals.plos.org/plosone/article?id=10.1371/journal.pone.0013044#pone.0013044.s006	PLOS One	Modeling the Cost-Effectiveness of the Integrated Disease Surveillance and Response (IDSR) System: Meningitis in Burkina Faso	Meningitis	Africa	Burkina Faso	Country	Direct costs	Data in supplementary materials	Primary	Google Scholar
51	https://bmchealthservres.biomedcentral.com/articles/10.1186/s12913-020-05880-5	BMC Health Services Research	The economic burden of measles in children under five in Bangladesh	Measles	Asia	Bangladesh	Country	Direct costs		Secondary	Google
52	https://doi.org/10.1371/journal.pntd.0005124	PLOS Neglected Tropical Diseases	Oral Cholera Vaccination Delivery Cost in Low- and Middle-Income Countries: An Analysis Based on Systematic Review	Cholera		n/a	Country	Price per dose; Vaccination Program preparation cost; Microplanning; Training; Sensitisation & Social Mobilisation; Other preparation costs; Vaccine administration cost; adverse effects following immunisation cost; total OCV delivery cost; Vaccine procurement cost; Total OCV Program cost	Systematic review using results from other reviews	Secondary	Google
53	https://doi.org/10.1186/s12879-017-2885-8	BMC Infectious Diseases	Delivery cost analysis of a reactive mass cholera vaccination campaign: a case study of Shanchol™ vaccine use in Lake Chilwa, Malawi	Cholera	Africa	Malawi	Country	Total population; Receiving OCV 1st and 2nd dose; Receiving OCV 1st dose only; Total number of vaccines distributed; Total number of doses used; Two-dose coverage; Vaccine procurement and shipment; Vaccine purchase cost; Vaccine shipment clearance and custom fees; Vaccine delivery costs; microplanning costs; sensitisation costs; training costs; social mobilisation costs; vaccination round 1 costs…		Primary	Google
54	https://doi.org/10.1371/journal.pone.0185041	PLOS One	Cost-of-illness of cholera to households and health facilities in rural Malawi	Cholera	Africa	Malawi	District	Direct medical cost before visiting the facility; direct medical cost in the facility; direct non-medical cost in the facility; indirect costs		Primary	Google

## Sheet: ORI program data
ID	URL	Publisher	Title	Infection	Region	Country	Data level	Measures	Notes	Source from search	Search engine used
1	https://pubmed.ncbi.nlm.nih.gov/35432705/	Pubmed	Measles outbreak response immunization during the COVID-19 pandemic: lessons from Borno State, Nigeria	Measles	Africa	Nigeria	State	Number of children vaccinated, number of new vaccinations, number of vaccination teams (split by facility/outreach)		Primary	Google
2	https://reliefweb.int/report/south-africa/three-cases-measles-outbreak-confirmed-limpopo	reliefweb	Three cases of measles outbreak confirmed in Limpopo	Measles	Africa	South Africa	District	Number of children vaccinated		Primary	Google
3	https://www.ncbi.nlm.nih.gov/pmc/articles/PMC8882431/	Vaccine	Nepal measles outbreak response immunization during COVID-19: A risk-based intervention strategy	Measles	Asia	Nepal	District	Number of children vaccinated, estimated impact of ORI		Primary	Google
4	https://www.ncbi.nlm.nih.gov/pmc/articles/PMC4419178/	Iranian Journal of Public Health	Measles Outbreak in South of Iran, Where Vaccine Coverage Was High: A Case-Series Study	Measles	Asia	Iran	District	Number of children vaccinated		Primary	Google
5	https://www.ncbi.nlm.nih.gov/pmc/articles/PMC7532848/	The Pan African Medical Journal	Madagascar 2018-2019 measles outbreak response: main strategic areas	Measles	Africa	Madagascar	Country	Number of children vaccinated		Primary	Google
6	https://academic.oup.com/jid/article/204/suppl_1/S252/2194402	The Journal of Infectious Diseases	Impact of a Measles Outbreak Response Immunization Campaign: Maroua, Cameroon, 2009	Measles	Africa	Cameroon	Country	Number of children vaccinated, Number of children vaccinated by age group		Secondary	Google
7	https://www.who.int/emergencies/disease-outbreak-news/item/2023-DON446	WHO	Measles - Nepal	Measles	Asia	Nepal	Country	Number of children vaccinated		Primary	Google
8	https://www.kff.org/global-health-policy/issue-brief/the-latest-ebola-outbreak-what-has-changed-in-the-international-and-u-s-response-since-2014/	Kaiser Fmaily Foundation	The Latest Ebola Outbreaks: What Has Changed in the International and U.S. Response Since 2014?	Ebola	Africa	DRC	Country	Number of people vaccinated		Primary	Google
9	https://bmcinfectdis.biomedcentral.com/articles/10.1186/s12879-021-06727-y/tables/2	BMC Infectious Diseases	The resurgence of yellow fever outbreaks in Nigeria: a 2-year review 2017–2019	Yellow Fever	Africa	Nigeria	District	Number of people vaccinated	11 different capaigns over 2 years, data in Table 2	Primary	Google
10	https://bmcpublichealth.biomedcentral.com/articles/10.1186/s12889-022-14043-6	BMC Public Health	Epidemiological description of and response to a large yellow fever outbreak in Edo state Nigeria, September 2018 - January 2019	Yellow Fever	Africa	Nigeria	State	Number of people vaccinated		Primary	Google
11	https://academic.oup.com/jid/article/220/Supplement_4/S225/5610780	The Journal of Infectious Diseases	Meningococcal Meningitis Outbreaks in the African Meningitis Belt After Meningococcal Serogroup A Conjugate Vaccine Introduction, 2011–2017	Meningitis	Africa	Niger, Burkina, Ethiopia, Nigeria, Ghana, Togo, Cameroon	Country	Number of people vaccinated, Average response delay	Data in Tables 3 and 4	Primary	Google
12	https://journals.plos.org/plosone/article?id=10.1371/journal.pone.0199257	PLOS One	Time delays in the response to the Neisseria meningitidis serogroup C outbreak in Nigeria – 2017	Meningitis	Africa	Nigeria	State	Time delays in response, number of doses ordered, number of doses received		Primary	Google
13	https://www.ncbi.nlm.nih.gov/pmc/articles/PMC3769208/?report=reader	PLOS Medicine	Feasibility of Mass Vaccination Campaign with Oral Cholera Vaccines in Response to an Outbreak in Guinea	Cholera	Africa	Guinea	Country	Number of first doses delivered, number of second doses delivered, vaccine costs (with breakdowns)		Secondary	Google
14	https://www.ncbi.nlm.nih.gov/pmc/articles/PMC5791774/	Bulletin of the World Health Organization	Implementation research: reactive mass vaccination with single-dose oral cholera vaccine, Zambia	Cholera	Africa	Zambia	Country	Number of first doses delivered, doses delivered per day (static/mobile site), wastage, vaccine costs (with breakdowns)		Primary	Google
15	https://bmcmedicine.biomedcentral.com/articles/10.1186/s12916-020-01865-7	BMC Medicine	Early detection of cholera epidemics to support control in fragile states: estimation of delays and potential epidemic sizes	Cholera	World	N/A	Country	Time delays in response	Systematic review of time to detection and response for cholera outbreaks, no discussion of ORI	Primary	Google
16	https://www.who.int/emergencies/disease-outbreak-news/item/2022-DON398_1	WHO	Cholera - Somalia	Cholera	Africa	Somalia	Country	Number of people vaccinated		Primary	Google
17	https://conflictandhealth.biomedcentral.com/articles/10.1186/s13031-022-00445-1	Conflict and Health	Identifying transferable lessons from cholera epidemic responses by Médecins Sans Frontières in Mozambique, Malawi and the Democratic Republic of Congo, 2015–2018: a scoping review	Cholera	Africa	Mozambique, Malawi, DRC	Country	Time delays in response	Scoping review for time to detection and response for cholera outbreaks (by MSF), no discussion of ORI	Primary	Google
18	https://www.thelancet.com/journals/langlo/article/PIIS2214-109X(14)70368-7/fulltext	The Lancet Global Health	Effectiveness of reactive oral cholera vaccination in rural Haiti: a case-control study and bias-indicator analysis	Cholera	Americas	Haiti	Country	Number of people vaccinated, proportion of people vaccinated with two doses		Primary	Google
19	https://www.sciencedirect.com/science/article/pii/S0264410X09010810	Vaccine	Impact of measles outbreak response vaccination campaign in Dar es Salaam, Tanzania	Measles	Africa	Tanzania	District	Number of people vaccinated		Primary	Google Scholar
20	https://academic.oup.com/jid/article/204/suppl_1/S35/2192500	The Journal of Infectious Diseases	Should Outbreak Response Immunization Be Recommended for Measles Outbreaks in Middle- and Low-Income Countries? An Update	Measles	World	N/A	Varied	Number of people vaccinated, time to response	A systematic review with a collection of results from different countries in Table 1	Primary	Google Scholar
21	https://apps.who.int/iris/handle/10665/329811	WHO	Responding to measles outbreak: closing the immunity gap in children of Timor-Leste	Measles	South-East Asia	Timor-Leste	Country	Number of children vaccinated		Primary	Google Scholar
22	https://www.ncbi.nlm.nih.gov/pmc/articles/PMC4675153/	Western Pacific Surveillance and Response Journal	Measles outbreak investigation in a remote area of Solomon Islands, 2014	Measles	Pacific	Solomon Islands	District	Number of children vaccinated		Primary	Google Scholar
23	https://www.ncbi.nlm.nih.gov/pmc/articles/PMC5375093/	Western Pacific Surveillance and Response Journal	Lessons learnt from a measles outbreak in Madang Province, Papua New Guinea, June 2014 – March 2015	Measles	Pacific	PNG	Province	Number of vaccines delivered, number of vaccines wasted		Primary	Google Scholar
24	https://conflictandhealth.biomedcentral.com/articles/10.1186/1752-1505-8-9	Conflict and Health	Description of a large measles epidemic in Democratic Republic of Congo, 2010–2013	Measles	Africa	DRC	District	Vaccine coverage estimates before and after ORI		Primary	Google Scholar
25	https://www.cdc.gov/mmwr/preview/mmwrhtml/mm5535a3.htm	CDC	Measles Outbreak and Response --- Fiji, February--May 2006	Measles	Pacific	Fiji	Country	Number of children vaccinated		Primary	Google Scholar
26	https://apps.who.int/iris/bitstream/handle/10665/241803/WER8634_370-376.PDF	WHO	Yellow fever in the WHO African and American Regions, 2010	Yellow Fever	Africa	DRC, Guinea, Senegal	Country	Number of people vaccinated		Primary	Google Scholar
27	https://gh.bmj.com/content/bmjgh/5/1/e002000.full.pdf	BMJ Global Health	The multi-sectorial emergency response to a cholera outbreak in Internally Displaced Persons camps in Borno State, Nigeria, 2017	Cholera	Africa	Nigeria	State	Number of people vaccinated, time delays in response		Primary	Google Scholar
28	https://www.who.int/emergencies/disease-outbreak-news/item/yellow-fever---bolivarian-republic-of-venezuela	WHO	Yellow Fever- Venezuela (Bolivarian Republic of)	Yellow Fever	South America	Venezuela	Country	Number of people vaccinated		Secondary	Google
29	https://www.sciencedirect.com/science/article/pii/S0264410X15015686	Vaccine	Mass vaccination with a two-dose oral cholera vaccine in a long-standing refugee camp, Thailand	Cholera	South-East Asia	Thailand	Refugee camp	Number of vaccines delivered, number of vaccines wasted, number of people vaccinated with two doses		Primary	Google
30	https://www.ncbi.nlm.nih.gov/pmc/articles/PMC6525480/	Proceedings of the National Academy of Sciences	Ebola vaccination in the Democratic Republic of the Congo	Ebola	Africa	DRC	Country	Number of people vaccinated, time delays in response		Primary	Google
31	https://reliefweb.int/report/democratic-republic-congo/democratic-republic-congo-declares-14th-ebola-outbreak-over	Relief web	The Democratic Republic of the Congo declares 14th Ebola outbreak over	Ebola	Africa	DRC	Country	Number of people vaccinated, number of contacts vaccinated, number of healthcare workers vaccinated		Primary	Google
32	https://www.afro.who.int/publications/ebola-virus-disease-outbreak-uganda-situation-reports	WHO	Ebola Virus Disease Outbreak Uganda Situation Reports	Ebola	Africa	Uganda	Country	Number of people vaccinated, number of contacts vaccinated, number of contacts of contacts vaccinated, number of healthcare workers vaccinated, number of vaccines delivered per day	Detaill in PDF daily reports	Primary	Google
33	https://www.thelancet.com/journals/laninf/article/PIIS1473-3099(17)30541-8/fulltext	The Lancet Infectious Diseases	Ring vaccination with rVSV-ZEBOV under expanded access in response to an outbreak of Ebola virus disease in Guinea, 2016: an operational and vaccine safety report	Ebola	Africa	Guinea	Country	Number of people vaccinated, number of contacts vaccinated, number of healthcare workers vaccinated		Primary	Google
34	https://journals.plos.org/plosmedicine/article?id=10.1371/journal.pmed.1001638	PLOS Medicine	Yellow Fever in Africa: Estimating the Burden of Disease and Impact of Mass Vaccination from Outbreak and Serological Data	Yellow Fever	Africa	All countries of Africa	Country	Outbreak occurrence, Vaccination coverage, number of infections, severe cases, deaths, vaccine doses, vaccine coverage		Secondary	Google
